# Supplementary material for: Urinary MicroRNAs as Potential Markers for Non-Invasive Diagnosis of Bladder Cancer
Source: MDPI journal article supplement (doi:10.3390/ijms21113814), 2020-05-27
Supplement: s1 [file s1]

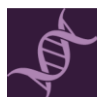

**Table S1:** Overview of selected studies on the BCa-associated diagnostic and prognostic value of urinary miRNA levels

| Reference | miRNAs                       | Issue of Analysis                                                                                                                 | Sample Type     | BCa/Con                | Method                   | Main Results                                                                                                                                      |
|-----------|------------------------------|-----------------------------------------------------------------------------------------------------------------------------------|-----------------|------------------------|--------------------------|---------------------------------------------------------------------------------------------------------------------------------------------------|
| [29]      | miR-125b<br>miR-183          | miRNA profiling in urine for BCa marker identification (many diagn. miRs identified, e.g. miR-125b & -183, finally others better) | urine sediment  | 1: 30/10<br>2: 151/126 | 1: qPCR-array<br>2: qPCR | detection of BCa e.g. by miR-125b ↓ & miR-183 ↑ (AUC: 0.726/0.722), miR-125b as prognostic marker in combination with miR-92a                     |
| [30]      | miR-21<br>miR-205<br>miR-221 | detection of BCa recurrence in patients under surveillance by a miRNA signature including miR-21, -205 and -221                   | whole urine     | 1: 60/21<br>2: 25/25   | 1: qPCR<br>2: qPCR       | detection of recurrent BCa (AUC: 0.85/0.74) by a 6-miR-combination (miR-16/-21/-34a/-200c/-205/-221)                                              |
| [32]      | miR-125b                     | miRNA profiling in urine for BCa marker identification (including miR-125b & -99a)                                                | cell-free urine | 1: 6/3<br>2: 50/21     | 1: microarray<br>2: qPCR | detection of BCa by miR-125b ↓ (AUC: 0.813), in combination with miR-99a (AUC: 0.876), miR-125b ↓ with G ↑ (AUC: 0.819)                           |
| [33]      | miR-125b<br>miR-126          | detection of BCa by miRNAs (miR-125b & -126) in comparison with VUC                                                               | urine sediment  | 1: 8/5<br>2: 8/3       | 1: qPCR<br>2: qPCR       | detection of BCa by miR-125b ↓ & miR-126 ↑, good decision-tree model better performing than VUC                                                   |
| [34]      | miR-125b                     | miRNA profiling in urine for BCa marker identification including miR-125b                                                         | cell-free urine | 1: 46/13<br>2: 27/23   | 1: qPCR-array<br>2: qPCR | detection of BCa by miR-125b ↓, high negative FC in all cohorts (validation AUC: 0.801), combination of miR-125b/204/5323/99a (AUC: 0.836)        |
| [36]      | miR-145                      | detection of BCa by miRNAs (miR-145 & -200a)                                                                                      | cell-free urine | 207/144                | qPCR                     | detection of BCa by miR-145 ↓, of NMIBC/ MIBC (AUC: 0.729/0.790), miR-145 ↓ in MIBC & HG-BCa                                                      |
| [37]      | miR-145                      | detection of BCa by an NLR-related miRNA signature including miR-145                                                              | urine sediment  | 31/28                  | qPCR                     | no significant differences for miR-145 btw. BCa & controls, no association with pathol. factors                                                   |
| [41]      | miR-96<br>miR-183            | detection of UC by miRNAs (miR-96 & -183) in comparison with VUC                                                                  | urine sediment  | 100/74                 | qPCR                     | detection of BCa by miR-96 ↑ & miR-183 ↑ (AUC: 0.831/0.817), expression ↑ with G ↑ & pT ↑                                                         |
| [42]      | miR-96                       | detection of BCa by miR-96 in comparison with VUC                                                                                 | urine sediment  | 94/90                  | qPCR                     | detection of BCa by miR-96 ↑ (AUC: 0.822), not associated with pathol. factors, but with bilharziasis                                             |
| [43]      | miR-96<br>miR-210            | HYAL1-regulating RNAs (miR-96 & -210) as BCa markers in urine                                                                     | urine sediment  | 94/116                 | qPCR                     | detection of BCa by miR-96 ↑ & miR-210 ↑ (AUC: 0.864/0.874), associated with age, pT & bilharziasis                                               |
| [44]      | miR-96                       | miRNA profiling in urine for BCa marker identification (miR-21/-96/-126/-145/-221 ...)                                            | urine sediment  | 1: 27/58<br>2: 61/60   | 1: qPCR-array<br>2: qPCR | detection of BCa (AUC: 0.982/0.958/0.902) by 25/20/ 10 miR-combination all only including miR-96                                                  |
| [45]      | miR-205                      | miRNA profiling in urine for BCa marker identification                                                                            | cell-free urine | 1: 66/48<br>2: 112/65  | 1: NGS<br>2: qPCR        | amongst others miR-205 upregulated in NMIBC & MIBC vs. controls, miR-21 & -183 altered too, but none was included in final diagnostic combination |
| [46]      | miR-126                      | miRNA profiling in urine for BCa marker identification (miR-126/-152/-182/-199a)                                                  | whole urine     | 1: 18/18<br>2: 29/18   | 1: qPCR-array<br>2: qPCR | detection of BCa by miR-126 ↑ (AUC: 0.747), comparable with miR-182 (AUC: 0.753)                                                                  |

|      |                                          |                                                                                                         |                                    |                                                  |                          |                                                                                                                                                     |
|------|------------------------------------------|---------------------------------------------------------------------------------------------------------|------------------------------------|--------------------------------------------------|--------------------------|-----------------------------------------------------------------------------------------------------------------------------------------------------|
| [47] | miR-210                                  | detection of BCa by miRNAs (miR-210, -221 & others) in relation to VUC & bilharziasis                   | urine sediment                     | 188/180                                          | qPCR-array               | detection of BCa by miR-210 ↑ (AUC: 0.836), better in combination with other miRs & VUC, no association with pathol. factors & bilharziasis         |
| [48] | miR-21                                   | miRNA profiling in urine for BCa marker identification including miR-21                                 | cell-free urine                    | 1: pools<br>2: 85/45                             | 1: qPCR-array<br>2: qPCR | high FC for miR-21, but finally detection of BCa by a 4-miR-combination without miR-21 (AUC: 0.858)                                                 |
| [49] | miR-21                                   | detection of BCa by exosomal miRNAs (miR-15/-21/-31/-132/-155) in relation to VUC                       | urine exosomes                     | 1: 6/3<br>2:36/24                                | 1: microarray<br>2: qPCR | detection of BCa (AUC: 0.900) & of NMIBC (AUC: 0.912) by miR-21 ↑ & at negative VUC (AUC: 0.920)                                                    |
| [50] | miR-205                                  | detection of BCa by an EMT-related miRNA signature including miR-205                                    | cell-free urine                    | 32/177                                           | qPCR                     | detection of BCa by miR-205 ↓ (AUC: 0.845) & of NMIBC (AUC: 0.844)                                                                                  |
| [51] | miR-205                                  | detection of BCa by an EMT-related miRNA signature including miR-205                                    | urine sediment/<br>cell-free urine | 51/24                                            | qPCR                     | miR-205 not differentially expressed neither in urine sediment nor in cell-free urine supernatant                                                   |
| [52] | miR-96<br>miR-125b<br>miR-145<br>miR-205 | detection of BCa by a miRNA signature in relation to VUC (miR-96/-99a/-125b/-133a/-141/-145/-200c/-205) | not specified                      | 30/28 + 47<br>w. atypical<br>urothelial<br>cells | qPCR                     | BCa-related increase of miR-200c/-205 & decrease of miR-99a/-125b/-133a/-145, miR-96 & -141 not BCa-related, only miR-99a altered in atypical cells |

1 – test / screening cohort; 2 – discovery / validation cohort; AUC – area under the curve; BCa – bladder cancer; Con – control; EMT – epithelial-mesenchymal transition; FC – fold change; G – tumor grade; HG – high-grade; HYAL1 – Hyaluronidase-1; MIBC – muscle-invasive bladder cancer; NGS – next-generation sequencing; NLR – NOD-like receptors; NMIBC – non-muscle-invasive bladder cancer; pT – pathological tumor stage; qPCR – quantitative PCR; UC – urothelial cancer (including BCa, renal pelvic & ureter UC); VUC – voided urine cytology.
